# Supplementary material
Source: HighWire-hosted journal article supplement (https://cmaj.ca/highwire/filestream/78096/field_highwire_adjunct_files/1/200277-res-2-at.pdf)
Supplement: 200277-res-2-at.pdf [file 200277-res-2-at.pdf]

Appendix 2 (as submitted by authors): Supplementary figure

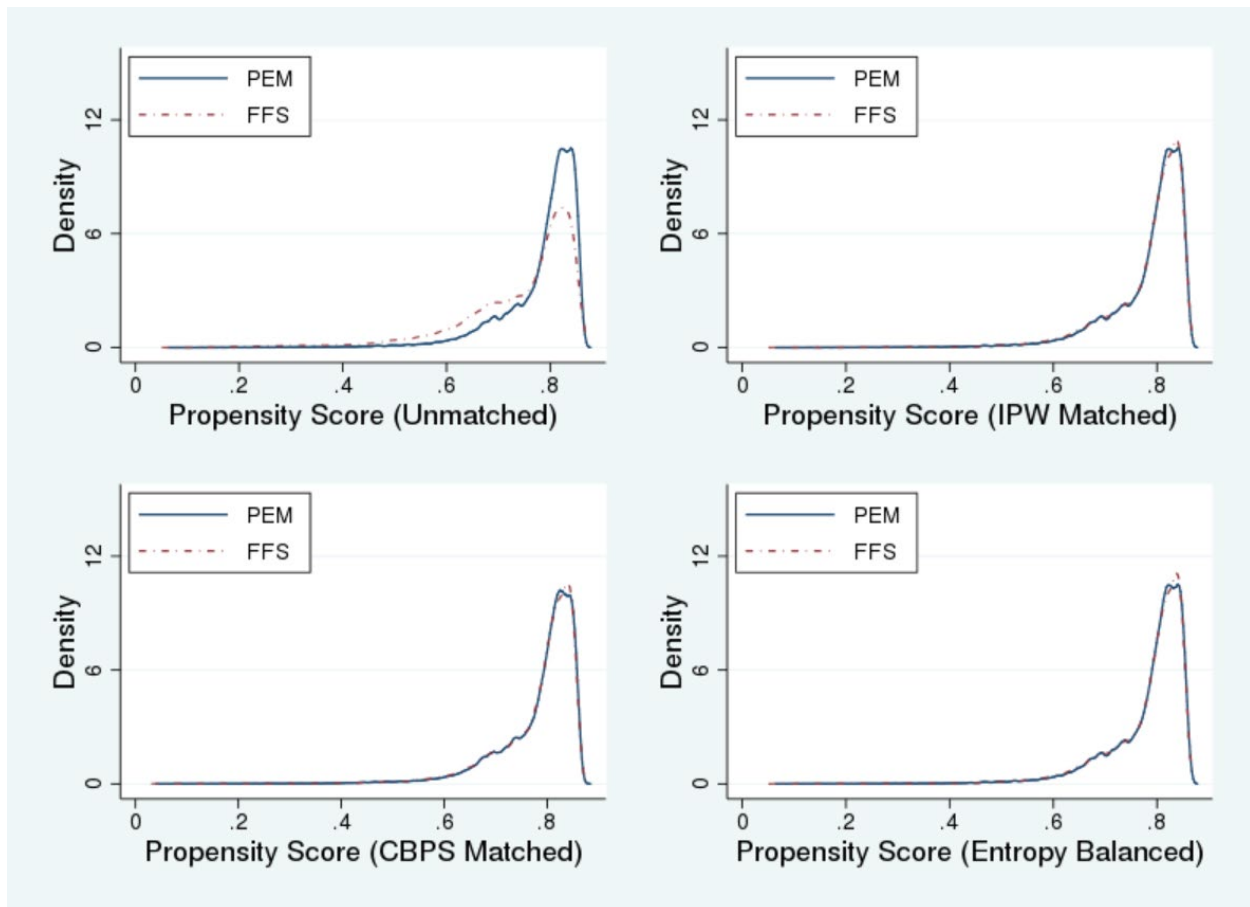

Figure A1. Distribution of propensity score before and after weighting using propensity score weighting and entropy balancing
